# Supplementary material for: Regulation of deep and shallow hole/electron trap states and charge conducting behaviors of dielectric tribo-materials for maximizing retained charges
Source: Royal Society of Chemistry journal article supplement (doi:10.1039/d4ee03008g), 2024-01-01
Supplement: d4ee03008g1.pdf [file d4ee03008g1.pdf]

**Regulation of deep and shallow hole/electron trap states and charge conducting behaviors of dielectric tribo-materials for maximizing retained charges**

*Jian Wang,<sup>a‡</sup> Shuyan Xu,<sup>a‡</sup> Gui Li,<sup>a</sup> Huiyuan Wu,<sup>a</sup> Kaixian Li,<sup>a</sup> Ai Chen,<sup>a</sup> Qionghua Zhao,<sup>a</sup> Shaoke Fu,<sup>a</sup> Chuncai Shan,<sup>a</sup> Yi Xi<sup>\*a</sup> and Chenguo Hu<sup>\*a</sup>*

<sup>a</sup> Department of Applied Physics, Chongqing Key Laboratory of Soft Condensed Matter Physics and Smart Materials, Chongqing University, Chongqing 400044, P.R. China

‡ These authors contributed equally to this work.

Email: [yxi6@cqu.edu.cn](mailto:yxi6@cqu.edu.cn) (Y Xi), [hucg@cqu.edu.cn](mailto:hucg@cqu.edu.cn) (C Hu)

**Fig. S1:** The binding effect of injected charge on excitation output.

**Fig. S2:** Test diagram of charge leakage current and surface conduction current.

**Fig. S3:** Test protocol for T-charges and R-charges.

**Fig. S4:** The output characteristics of UH-CSI-TENG with ETFE as triboelectric material.

**Fig. S5:** The output characteristics of UH-CSI-TENG with PCTFE as triboelectric material.

**Fig. S6:** The output characteristics of UH-CSI-TENG with FEP as triboelectric material.

**Fig. S7:** The output characteristics of UH-CSI-TENG with BOPP as triboelectric material.

**Fig. S8:** The output characteristics of UH-CSI-TENG with PTFE as triboelectric material.

**Fig. S9:** The output characteristics of UH-CSI-TENG with POF as triboelectric material.

**Fig. S10:** The output characteristics of UH-CSI-TENG with PP as triboelectric material.

**Fig. S11:** The output characteristics of UH-CSI-TENG with PFA as triboelectric material.

**Fig. S12:** The output characteristics of UH-CSI-TENG with PVC as triboelectric material.

**Fig. S13:** The output characteristics of UH-CSI-TENG with PI as triboelectric material.

**Fig. S14:** The output characteristics of UH-CSI-TENG with PVDC as triboelectric material.

**Fig. S15:** The output characteristics of UH-CSI-TENG with PVDF as triboelectric material.

**Fig. S16:** The output characteristics of UH-CSI-TENG with PVDF as triboelectric material.

**Fig. S17:** The output characteristics of UH-CSI-TENG with P(VDF-TrFE) as triboelectric material.

**Fig. S18:** The output characteristics of UH-CSI-TENG with PPS as triboelectric material.

**Fig. S19:** The output characteristics of UH-CSI-TENG with PS as triboelectric material.

**Fig. S20:** The output characteristics of UH-CSI-TENG with PE as triboelectric material.

**Fig. S21:** The output characteristics of UH-CSI-TENG with PDMS as triboelectric material.

**Fig. S22:** The output characteristics of UH-CSI-TENG with PMMA as triboelectric material.

**Fig. S23:** The output characteristics of UH-CSI-TENG with PEEK as triboelectric material.

**Fig. S24:** The output characteristics of UH-CSI-TENG with PC as triboelectric material.

**Fig. S25:** The output characteristics of UH-CSI-TENG with PAN as triboelectric material.

**Fig. S26:** The output characteristics of UH-CSI-TENG with PA as triboelectric material.

**Fig. S27:** The output characteristics of UH-CSI-TENG with PET as triboelectric material.

**Fig. S28:** The output characteristics of UH-CSI-TENG with PLA as triboelectric material.

**Fig. S29:** The output characteristics of UH-CSI-TENG with PEI as triboelectric material.

**Fig. S30:** The output characteristics of UH-CSI-TENG with PU as triboelectric material.

**Fig. S31:** The output characteristics of UH-CSI-TENG with TPU as triboelectric material.

**Fig. S32:** The output characteristics of UH-CSI-TENG with PVA as triboelectric material.

**Fig. S33:** The output characteristics of UH-CSI-TENG with P(VDF-TrFE-CFE) as triboelectric material.

**Fig. S34:** Charge leakage current and surface conduction current of PVTC.

**Fig. S35:** Dynamic excitation voltage of PI with different thickness.

**Fig. S36:** Crystalline phase of silica.

**Fig. S37:** SEM image of charge transport layer. a) Normal doping. b) Excessive doping.

**Fig. S38:** Structure configuration of UH-CSI-TENG.

**Table S1.** Output charge density and charge dissipation rate comparison in the developmental stage of TENG.

**Table S2.** Quantify the charge (positive/negative) trapping and de-trapping ability of traditional triboelectric materials.

**Note S1.** Calculate the trap state distribution of dielectric polymer.

**Note S2.** Measure charge leakage current and surface conduction current.

**Note S3.** Surface potential measurement by KPFM.

**Video S1.** UH-CSI-TENG for powering four thermo-hygrometers.

**Video S2.** The high-output UH-CSI-TENG lights 3296 LEDs.

**Video S3.** The UH-CSI-TENG lights 12 parallel 2W bulbs.

**Video S4.** The UH-CSI-TENG lights 6 parallel 12W bulbs.

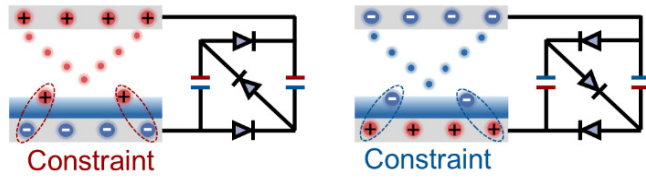

**Fig. S1:** The binding effect of injected charge on excitation output.

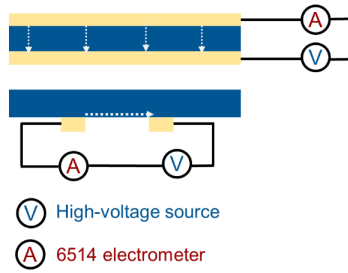

**Fig. S2:** Test diagram of charge leakage current and surface conduction current.

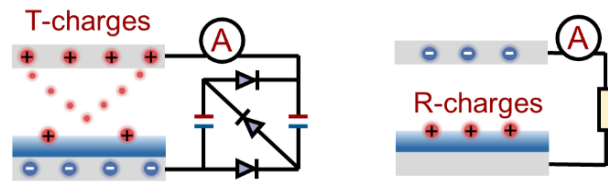

**Fig. S3:** Test protocol for T-charges and R-charges.

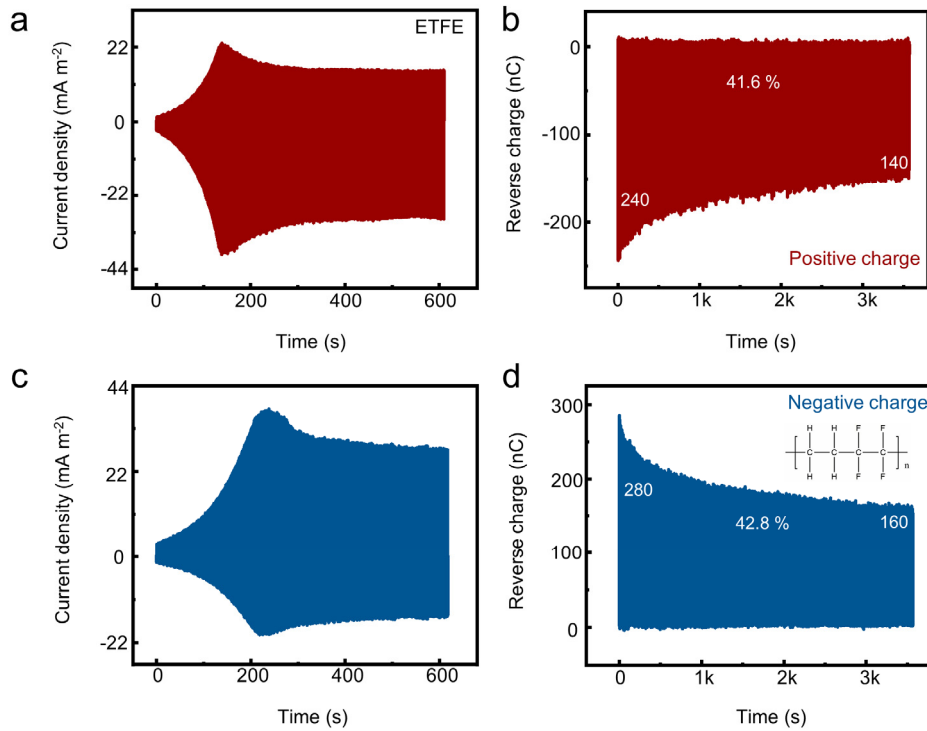

**Fig. S4:** The output characteristics of UH-CSI-TENG with ETFE as triboelectric material. a) Dynamic current density output with positive charge injection, b) Charge dissipation of the injected positive charge, c) Dynamic current density output with negative charge injection, and d) Charge dissipation of the injected negative charge, using ETFE film as the dielectric layer.

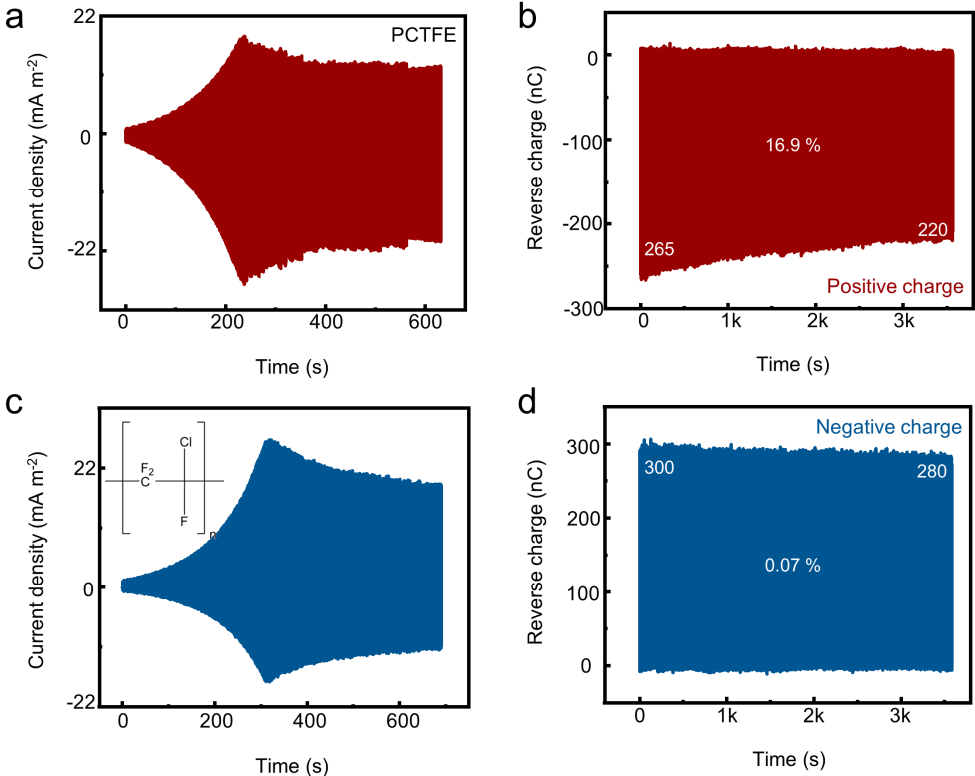

**Fig. S5:** The output characteristics of UH-CSI-TENG with PCTFE as triboelectric material. a) Dynamic current density output with positive charge injection, b) Charge dissipation of the injected positive charge, c) Dynamic current density output with negative charge injection, and d) Charge dissipation of the injected negative charge, using PCTFE film as the dielectric layer.

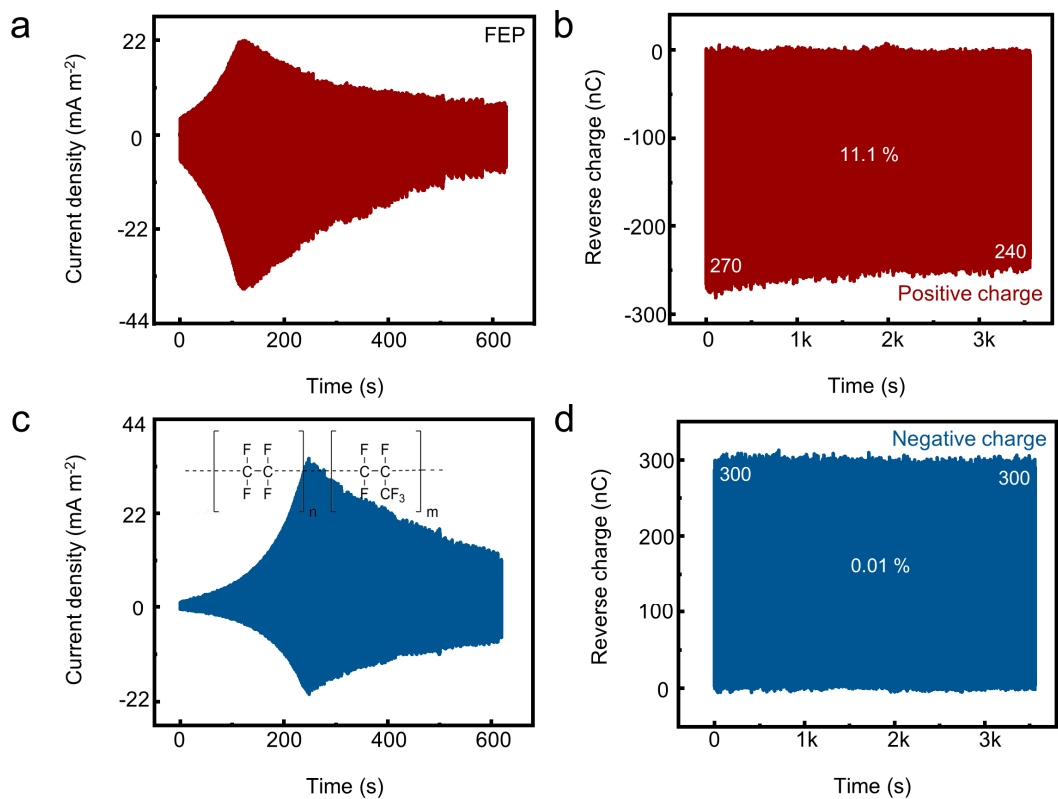

**Fig. S6:** The output characteristics of UH-CSI-TENG with FEP as triboelectric material. a) Dynamic current density output with positive charge injection, b) Charge dissipation of the injected positive charge, c) Dynamic current density output with negative charge injection, and d) Charge dissipation of the injected negative charge, using FEP film as the dielectric layer.

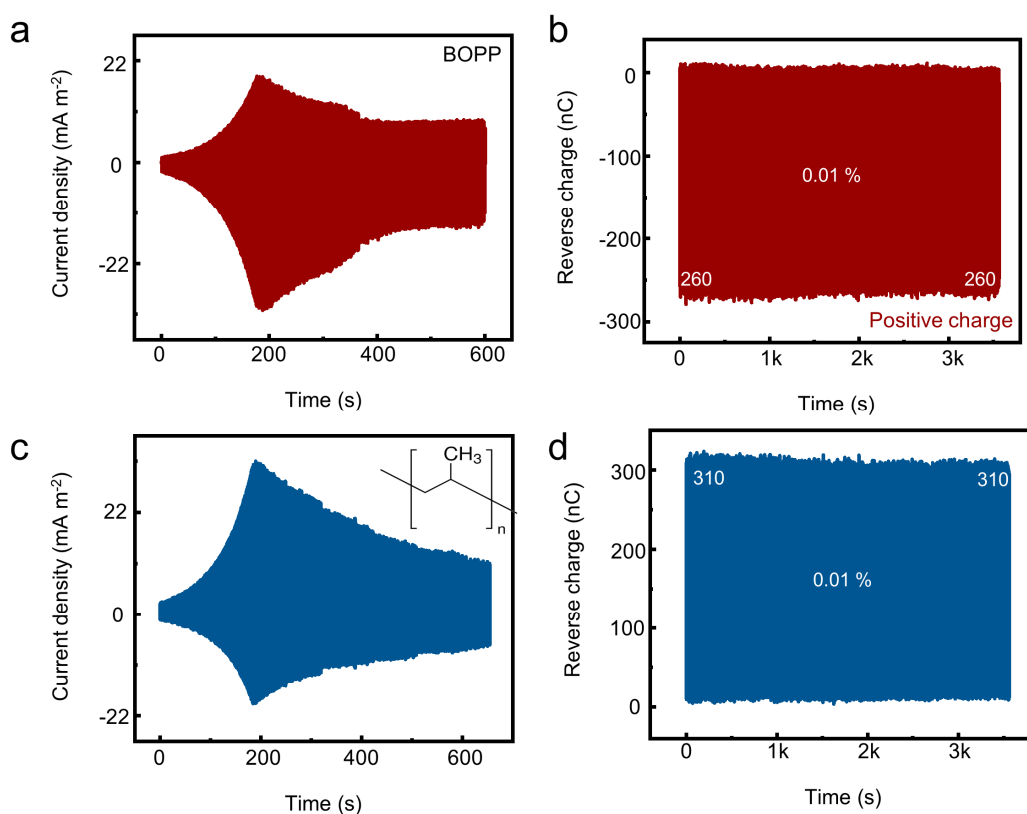

**Fig. S7:** The output characteristics of UH-CSI-TENG with BOPP as triboelectric material. a) Dynamic current density output with positive charge injection, b) Charge dissipation of the injected positive charge, c) Dynamic current density output with negative charge injection, and d) Charge dissipation of the injected negative charge, using BOPP film as the dielectric layer.

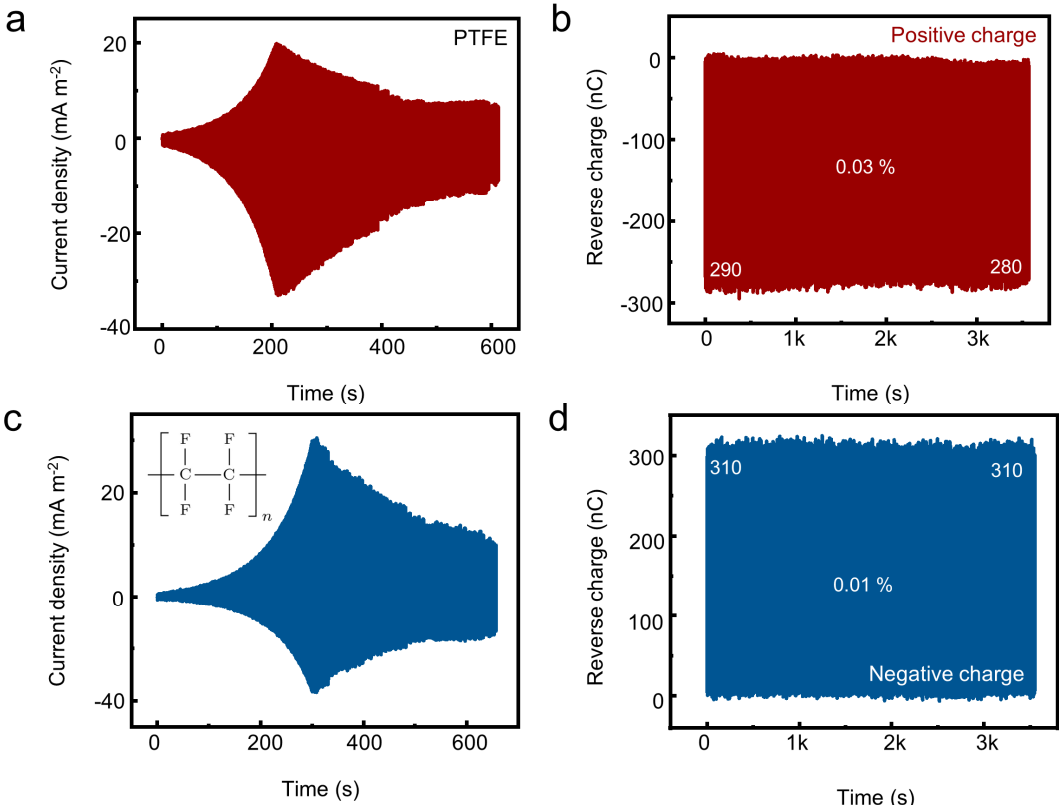

**Fig. S8:** The output characteristics of UH-CSI-TENG with PTFE as triboelectric material. a) Dynamic current density output with positive charge injection, b) Charge dissipation of the injected positive charge, c) Dynamic current density output with negative charge injection, and d) Charge dissipation of the injected negative charge, using PTFE film as the dielectric layer.

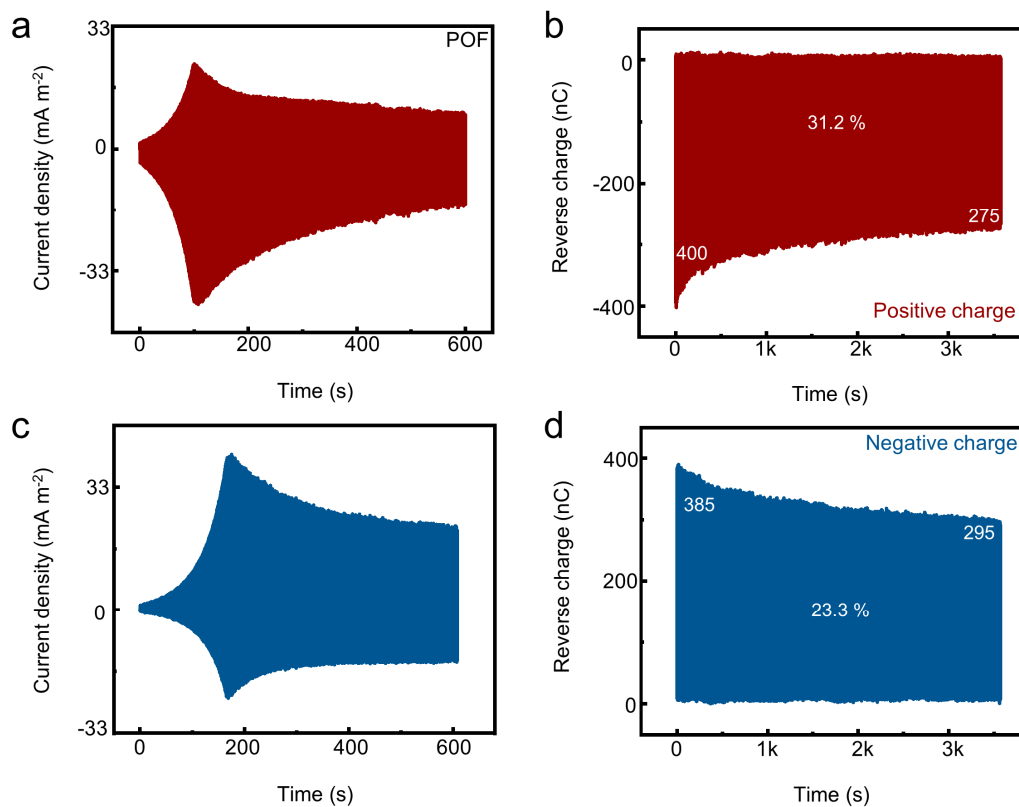

**Fig. S9:** The output characteristics of UH-CSE-TENG with POF as triboelectric material. a) Dynamic current density output with positive charge injection, b) Charge dissipation of the injected positive charge, c) Dynamic current density output with negative charge injection, and d) Charge dissipation of the injected negative charge, using POF film as the dielectric layer.

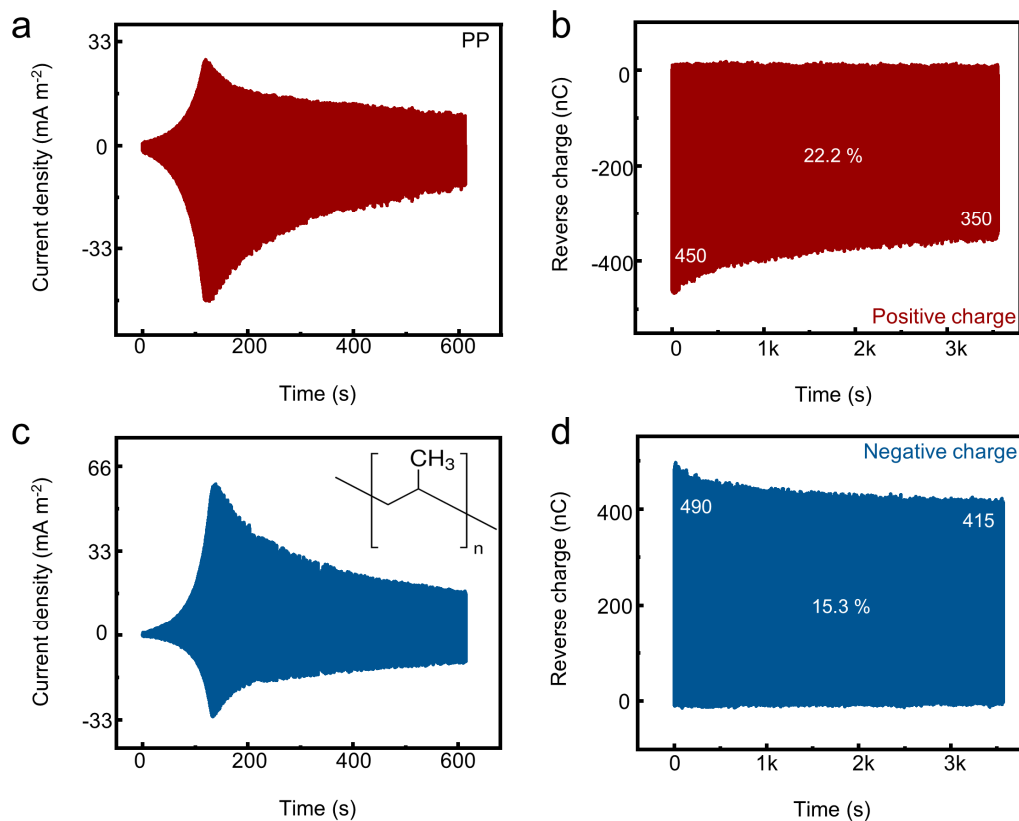



**Fig. S10:** The output characteristics of UH-CSI-TENG with PP as triboelectric material. a) Dynamic current density output with positive charge injection, b) Charge dissipation of the injected positive charge, c) Dynamic current density output with negative charge injection, and d) Charge dissipation of the injected negative charge, using PP film as the dielectric layer.

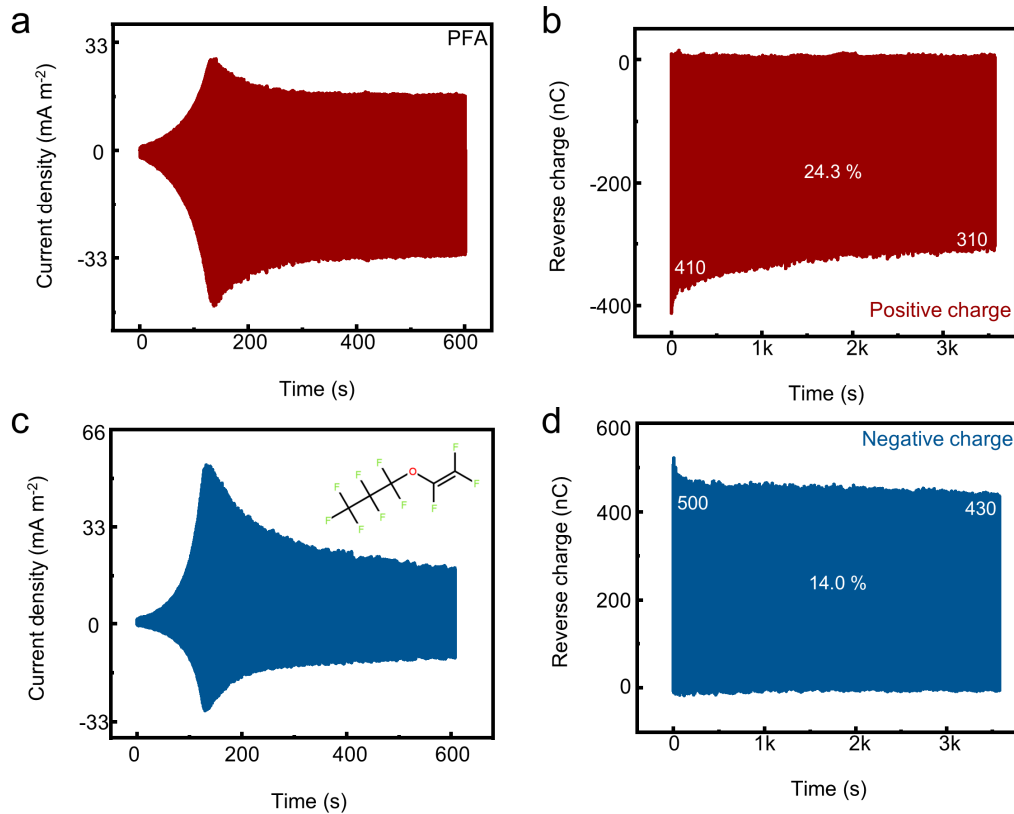

**Fig. S11:** The output characteristics of UH-CSI-TENG with PFA as triboelectric material. a) Dynamic current density output with positive charge injection, b) Charge dissipation of the injected positive charge, c) Dynamic current density output with negative charge injection, and d) Charge dissipation of the injected negative charge, using PFA film as the dielectric layer.

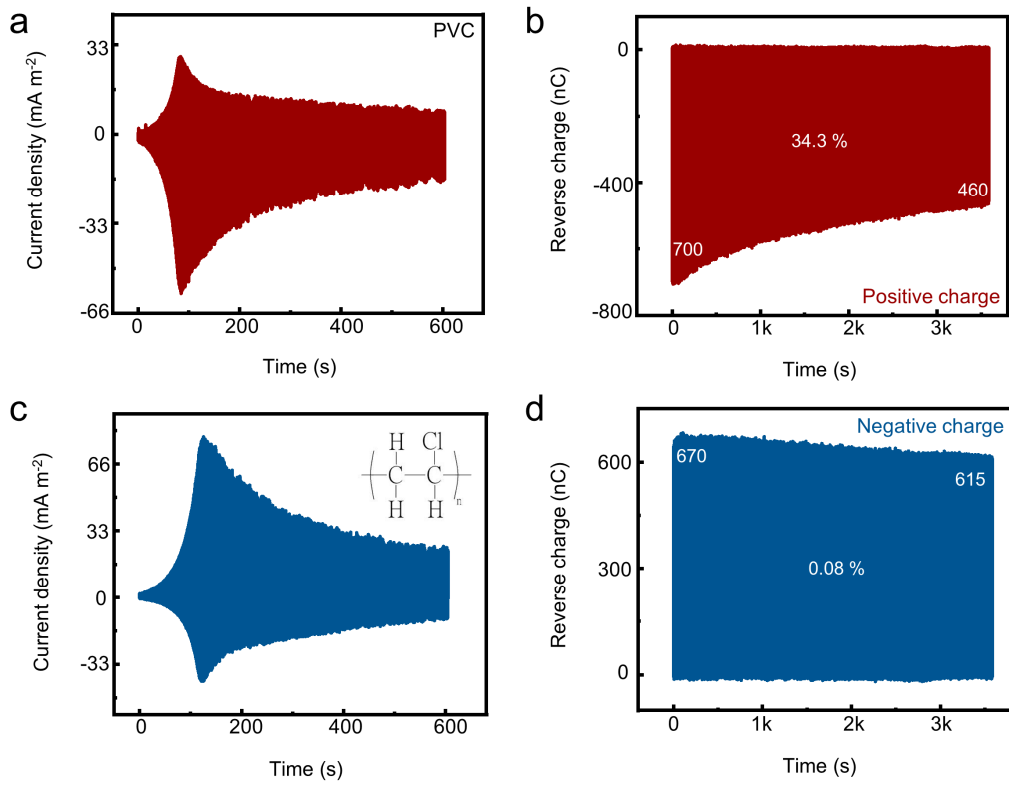

**Fig. S12:** The output characteristics of UH-CSI-TENG with PVC as triboelectric material. a) Dynamic current density output with positive charge injection, b) Charge dissipation of the injected positive charge, c) Dynamic current density output with negative charge injection, and d) Charge dissipation of the injected negative charge, using PVC film as the dielectric layer.

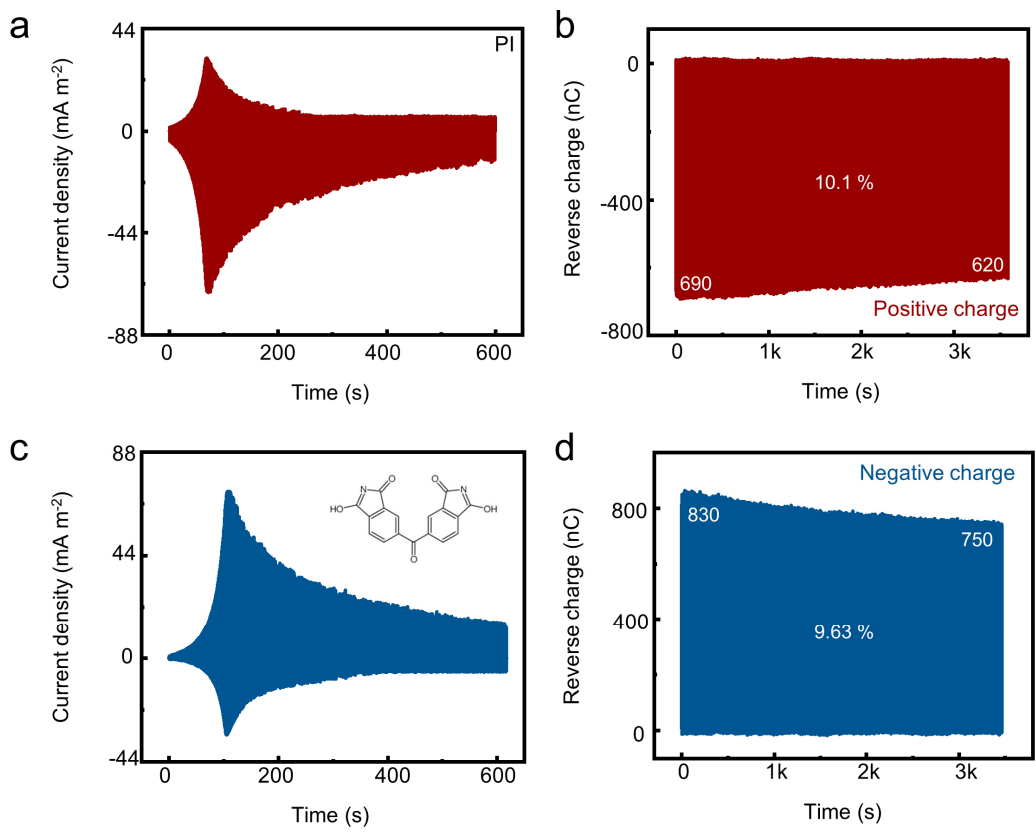

**Fig. S13:** The output characteristics of UH-CSI-TENG with PI as triboelectric material. a) Dynamic current density output with positive charge injection, b) Charge dissipation of the injected positive charge, c) Dynamic current density output with negative charge injection, and d) Charge dissipation of the injected negative charge, using PI film as the dielectric layer.

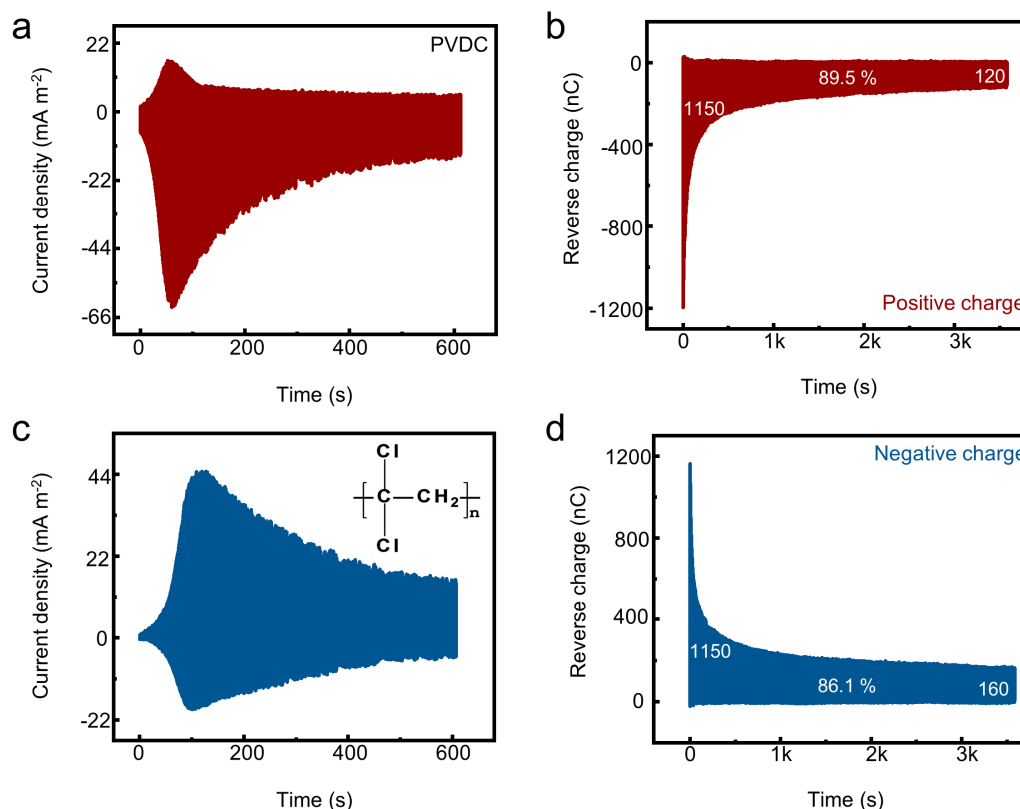

**Fig. S14:** The output characteristics of UH-CSI-TENG with PVDC as triboelectric material. a) Dynamic current density output with positive charge injection, b) Charge dissipation of the injected positive charge, c) Dynamic current density output with negative charge injection, and d) Charge dissipation of the injected negative charge, using PVDC film as the dielectric layer.

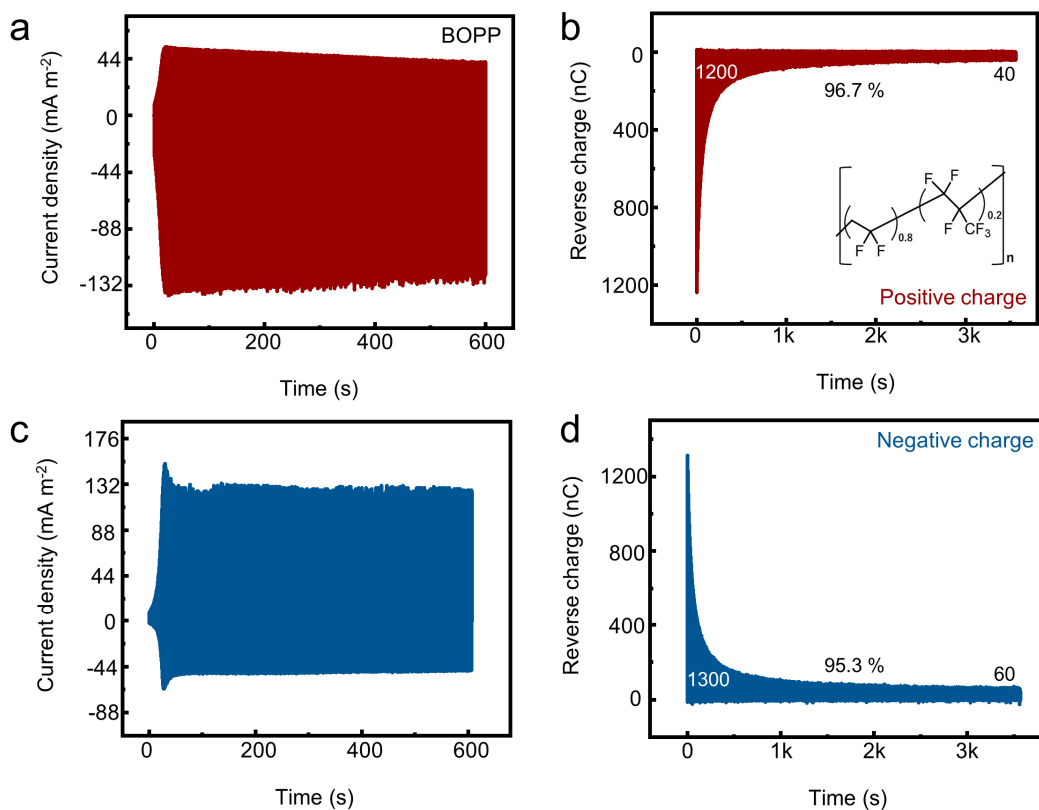

**Fig. S15:** The output characteristics of UH-CSE-TENG with BOPP as triboelectric material. a) Dynamic current density output with positive charge injection, b) Charge dissipation of the injected positive charge, c) Dynamic current density output with negative charge injection, and d) Charge dissipation of the injected negative charge, using BOPP film as the dielectric layer.

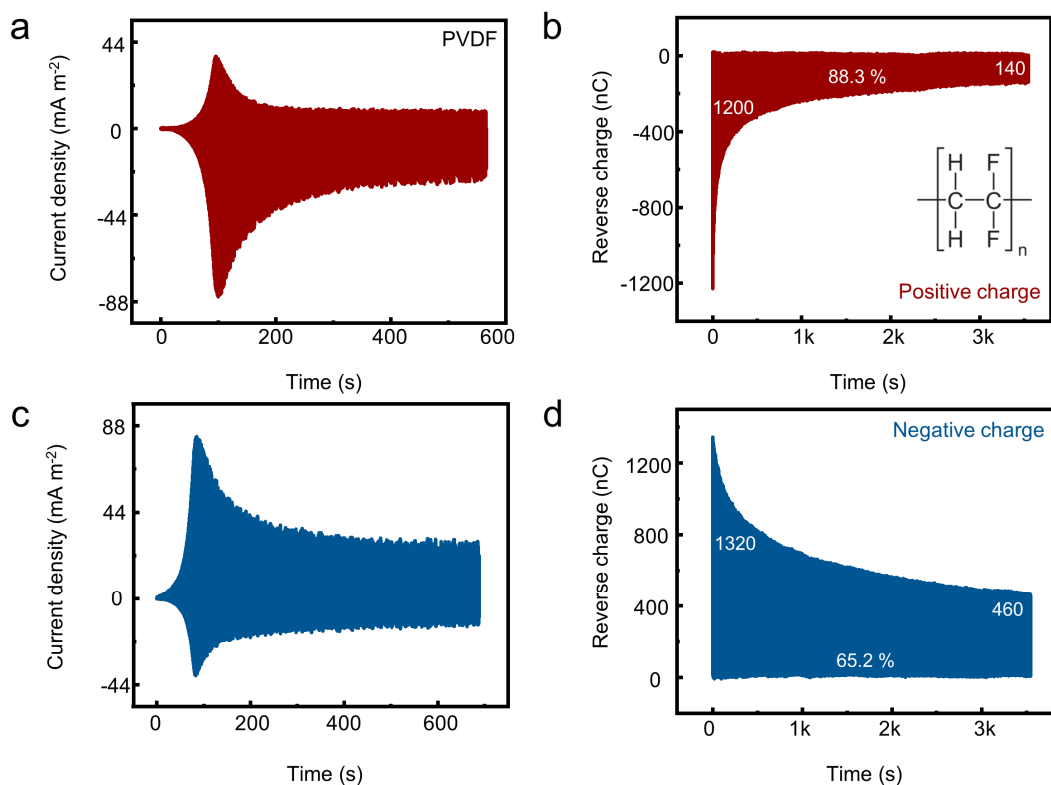

**Fig. S16:** The output characteristics of UH-CSI-TENG with PVDF as triboelectric material. a) Dynamic current density output with positive charge injection, b) Charge dissipation of the injected positive charge, c) Dynamic current density output with negative charge injection, and d) Charge dissipation of the injected negative charge, using PVDF film as the dielectric layer.

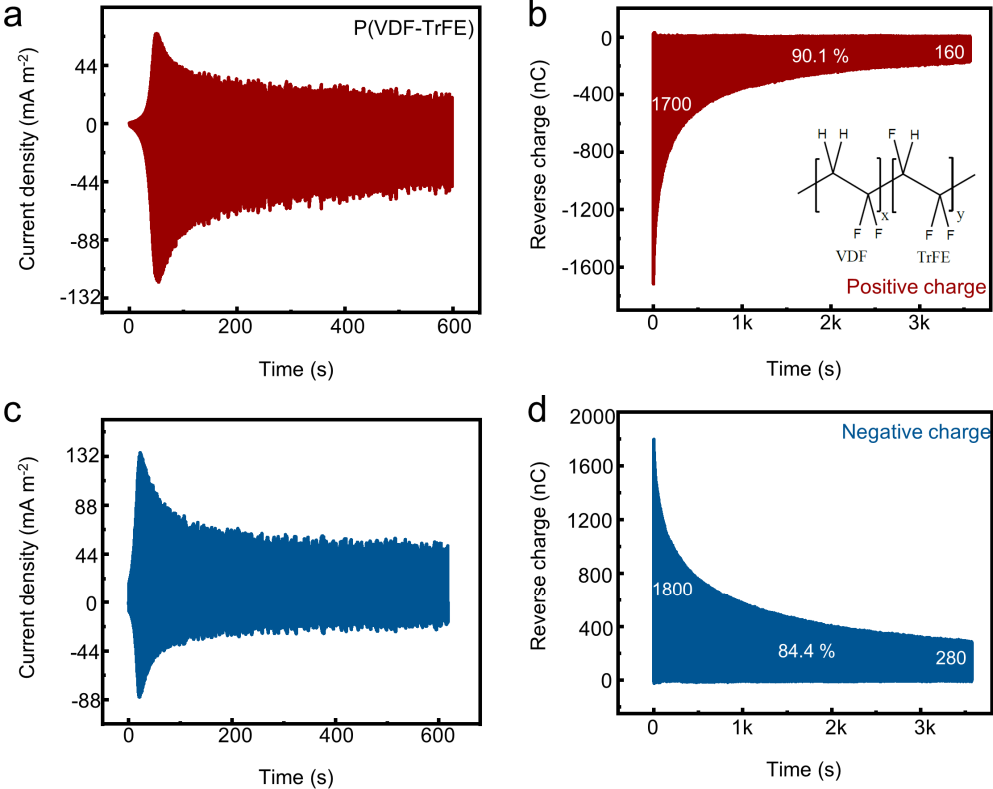

**Fig. S17:** The output characteristics of UH-CSI-TENG with P(VDF-TrFE) as triboelectric material. a) Dynamic current density output with positive charge injection, b) Charge dissipation of the injected positive charge, c) Dynamic current density output with negative charge injection, and d) Charge dissipation of the injected negative charge, using P(VDF-TrFE) film as the dielectric layer.

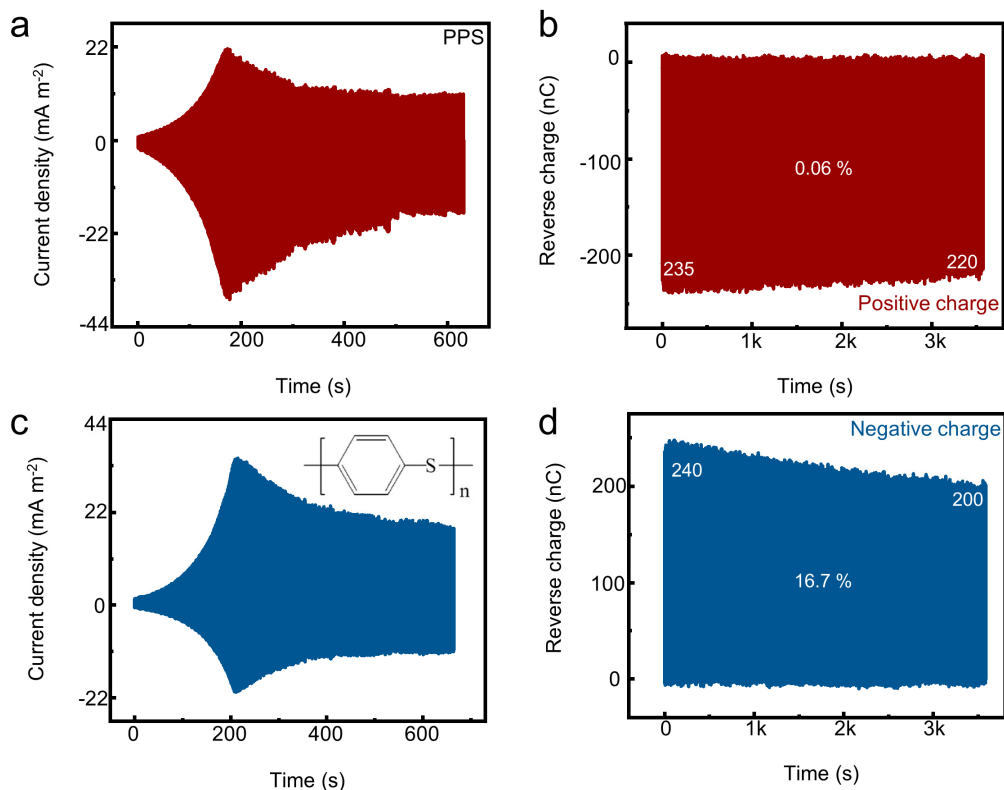

**Fig. S18:** The output characteristics of UH-CSI-TENG with PPS as triboelectric material. a) Dynamic current density output with positive charge injection, b) Charge dissipation of the injected positive charge, c) Dynamic current density output with negative charge injection, and d) Charge dissipation of the injected negative charge, using PPS film as the dielectric layer.

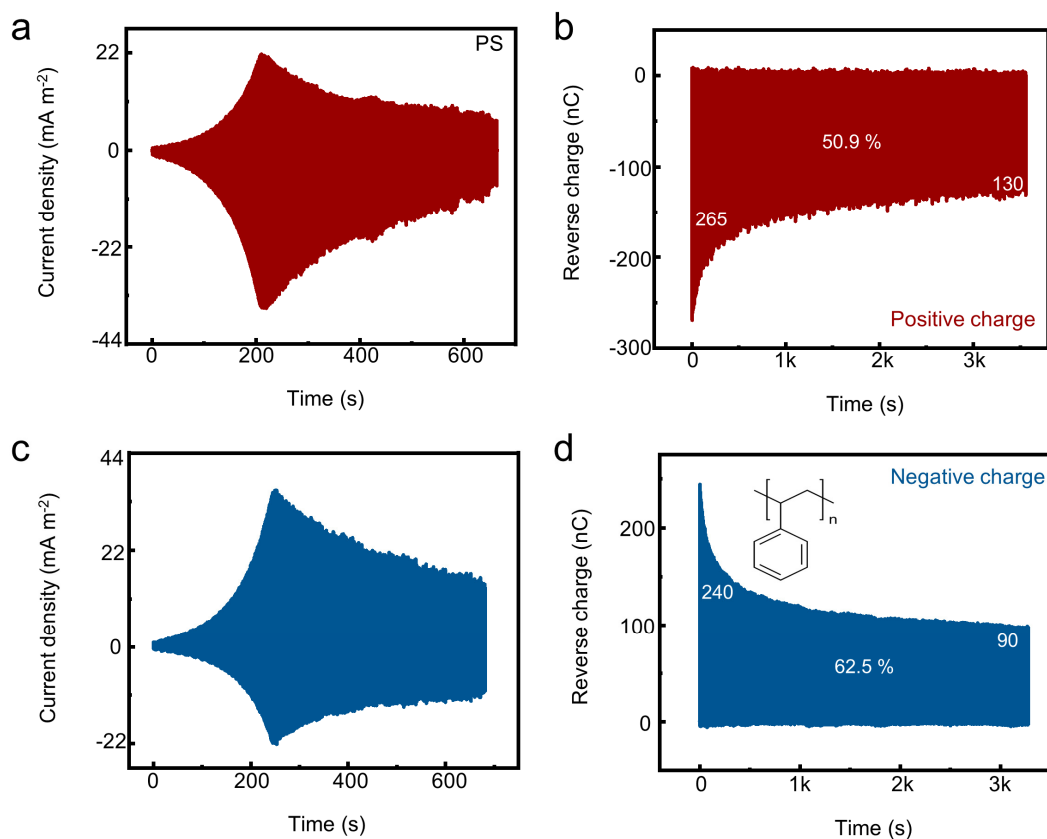

**Fig. S19:** The output characteristics of UH-CSI-TENG with PS as triboelectric material. a) Dynamic current density output with positive charge injection, b) Charge dissipation of the injected positive charge, c) Dynamic current density output with negative charge injection, and d) Charge dissipation of the injected negative charge, using PS film as the dielectric layer.

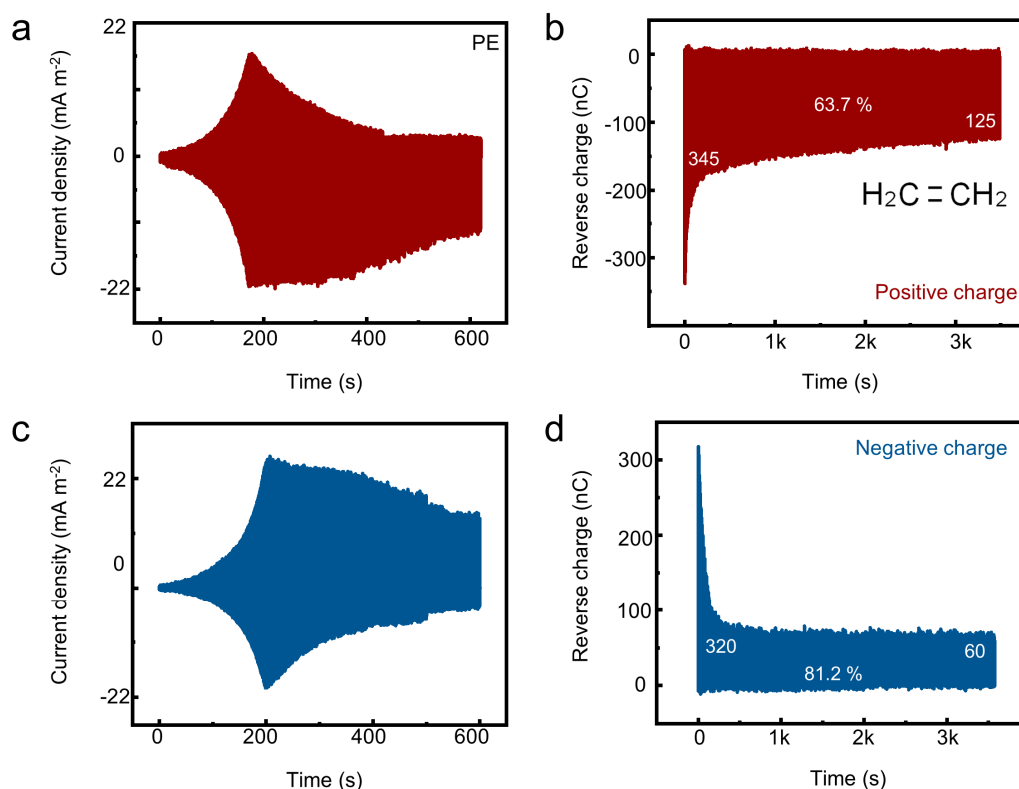

**Fig. S20:** The output characteristics of UH-CSI-TENG with PE as triboelectric material. a) Dynamic current density output with positive charge injection, b) Charge dissipation of the injected positive charge, c) Dynamic current density output with negative charge injection, and d) Charge dissipation of the injected negative charge, using PE film as the dielectric layer.

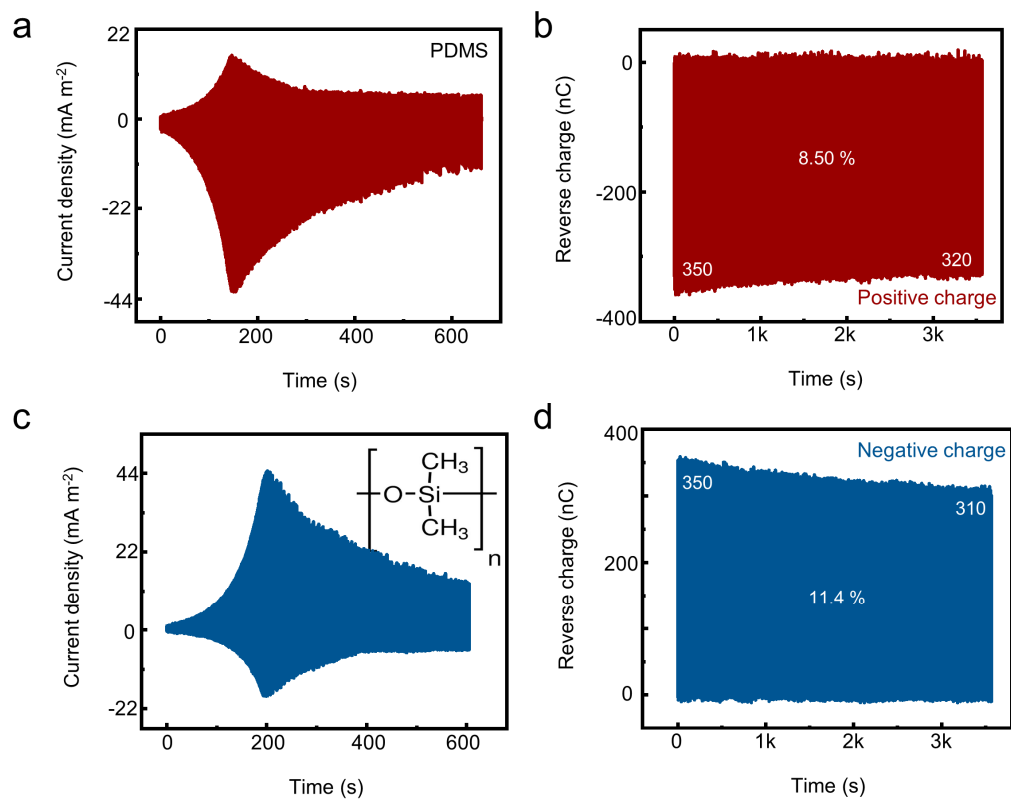

**Fig. S21:** The output characteristics of UH-CSI-TENG with PDMS as triboelectric material. a) Dynamic current density output with positive charge injection, b) Charge dissipation of the injected positive charge, c) Dynamic current density output with negative charge injection, and d) Charge dissipation of the injected negative charge, using PDMS film as the dielectric layer.

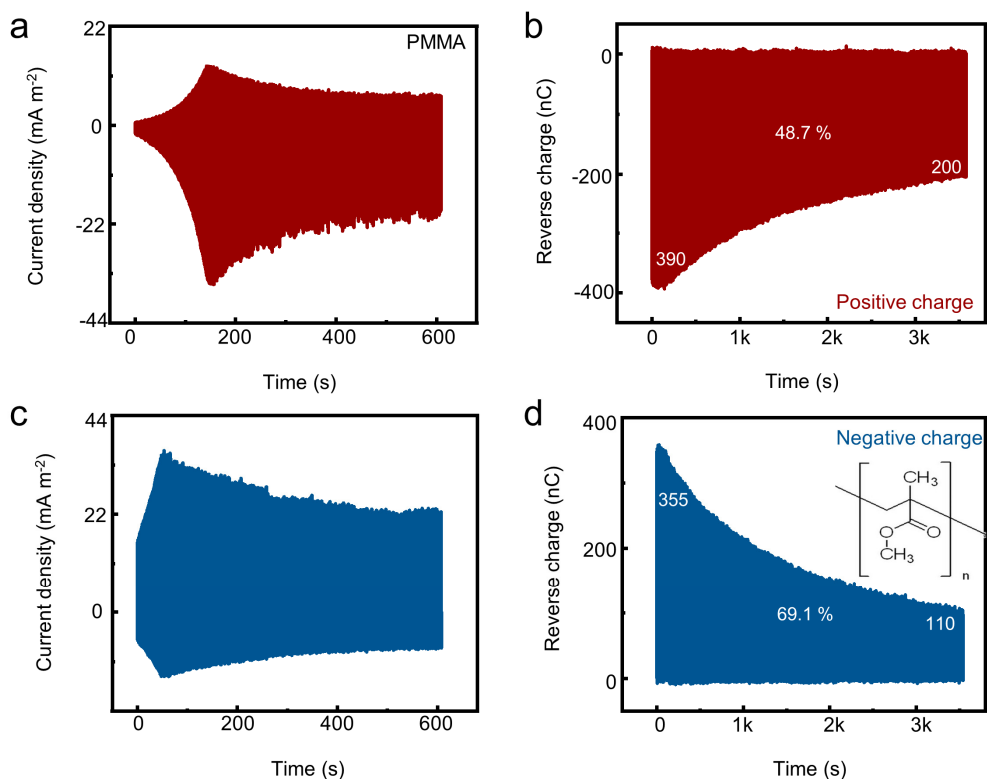



**Fig. S22:** The output characteristics of UH-CSI-TENG with PMMA as triboelectric material. a) Dynamic current density output with positive charge injection, b) Charge dissipation of the injected positive charge, c) Dynamic current density output with negative charge injection, and d) Charge dissipation of the injected negative charge, using PMMA film as the dielectric layer.

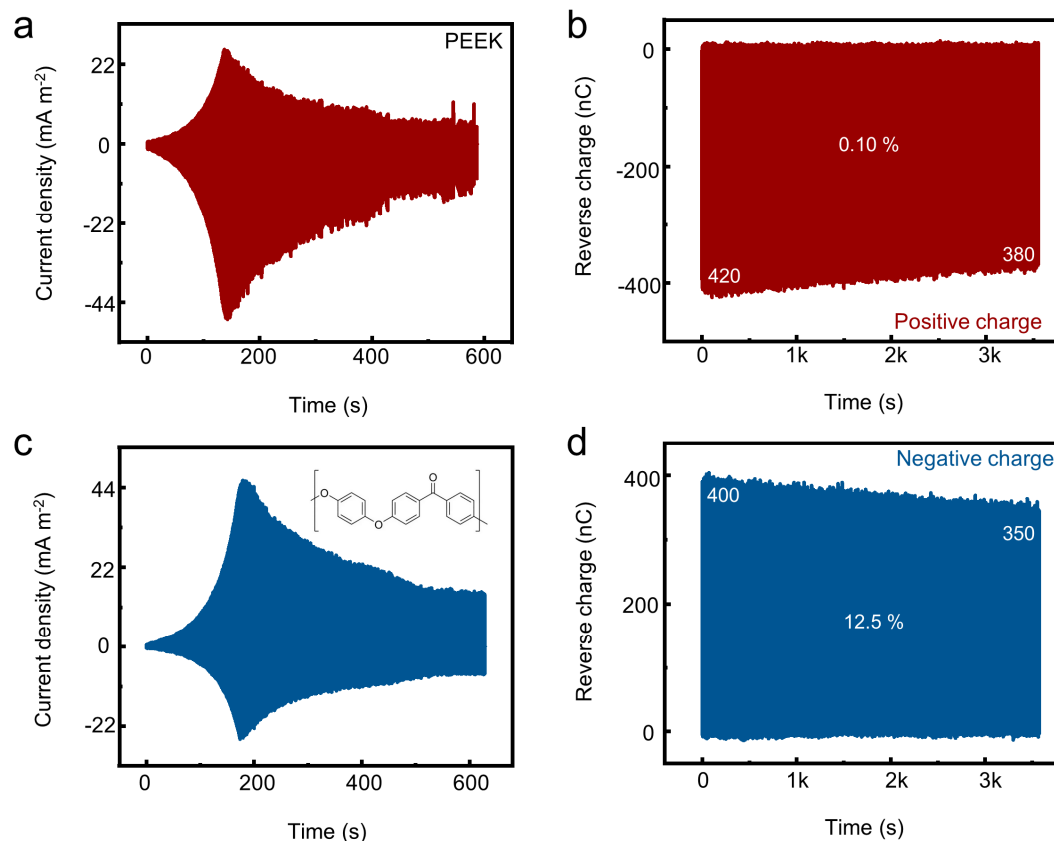

**Fig. S23:** The output characteristics of UH-CSI-TENG with PEEK as triboelectric material. a) Dynamic current density output with positive charge injection, b) Charge dissipation of the injected positive charge, c) Dynamic current density output with negative charge injection, and d) Charge dissipation of the injected negative charge, using PEEK film as the dielectric layer.

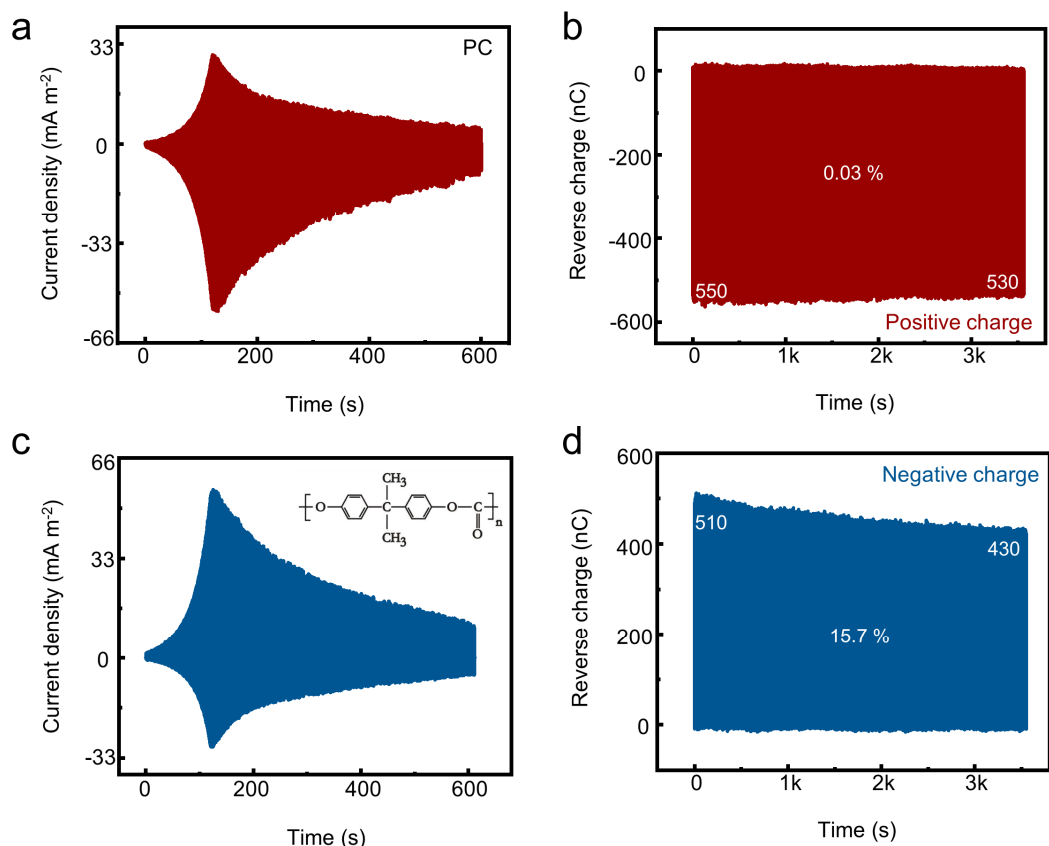

**Fig. S24:** The output characteristics of UH-CSI-TENG with PC as triboelectric material. a) Dynamic current density output with positive charge injection, b) Charge dissipation of the injected positive charge, c) Dynamic current density output with negative charge injection, and d) Charge dissipation of the injected negative charge, using PC film as the dielectric layer.

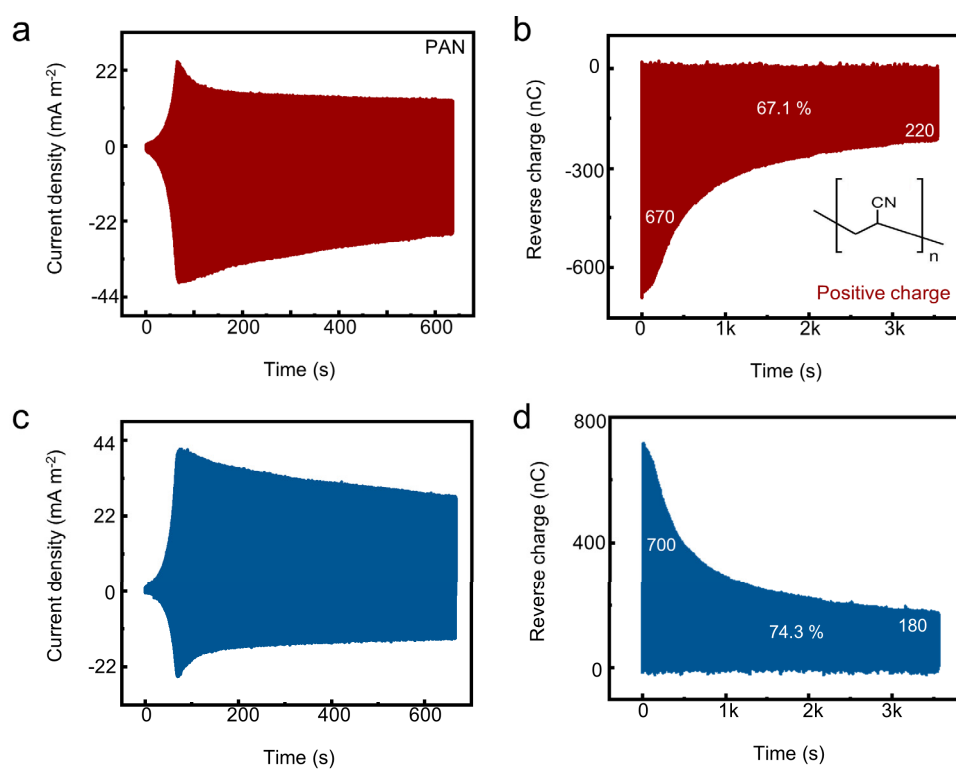

**Fig. S25:** The output characteristics of UH-CSI-TENG with PAN as triboelectric material. a) Dynamic current density output with positive charge injection, b) Charge dissipation of the injected positive charge, c) Dynamic current density output with negative charge injection, and d) Charge dissipation of the injected negative charge, using PAN film as the dielectric layer.

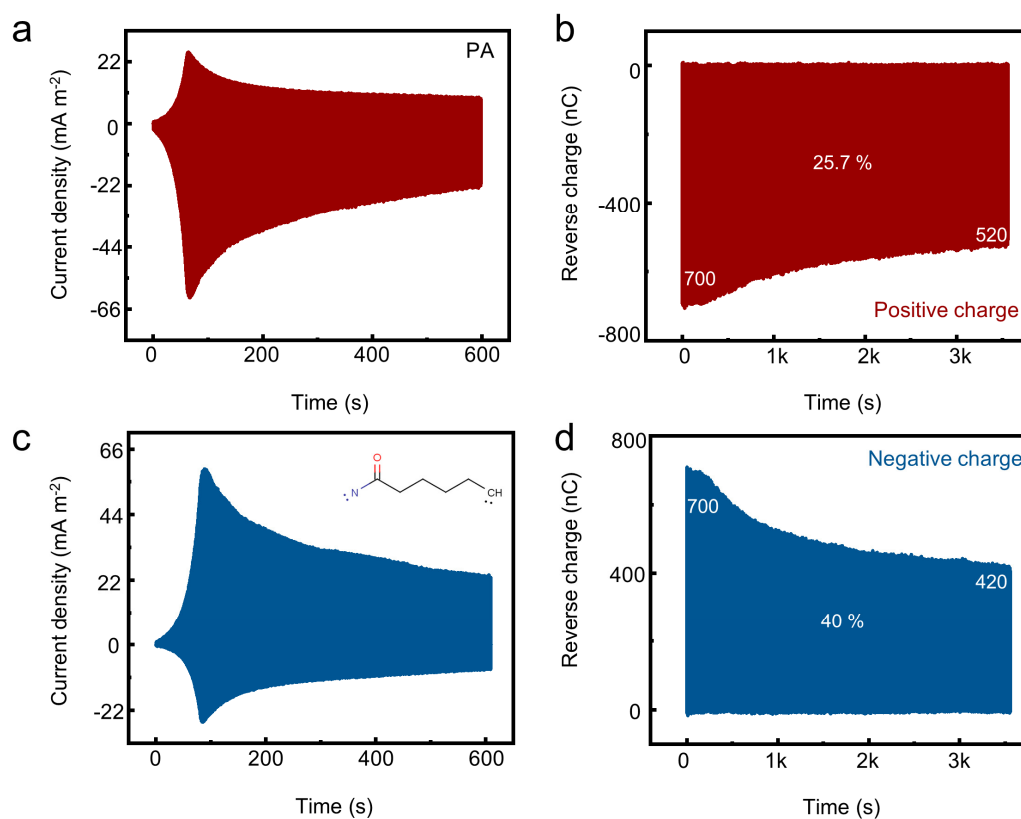

**Fig. S26:** The output characteristics of UH-CSI-TENG with PA as triboelectric material. a) Dynamic current density output with positive charge injection, b) Charge dissipation of the injected positive charge, c) Dynamic current density output with negative charge injection, and d) Charge dissipation of the injected negative charge, using PA film as the dielectric layer.

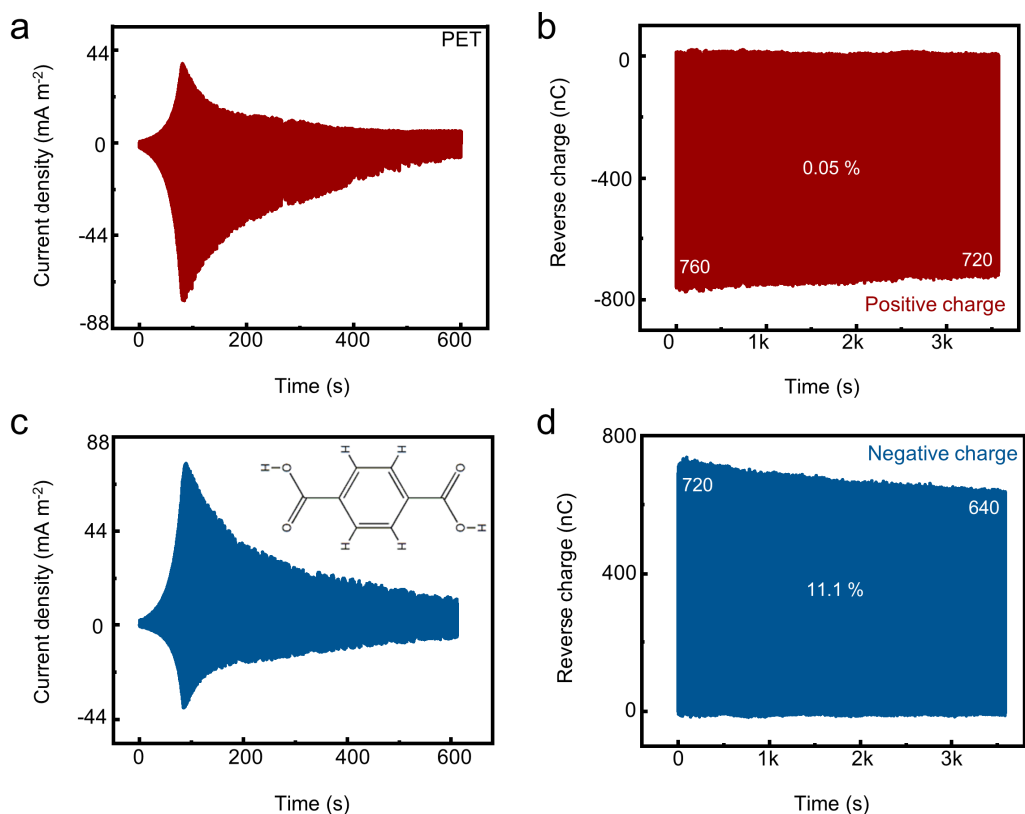

**Fig. S27:** The output characteristics of UH-CSI-TENG with PET as triboelectric material. a) Dynamic current density output with positive charge injection, b) Charge dissipation of the injected positive charge, c) Dynamic current density output with negative charge injection, and d) Charge dissipation of the injected negative charge, using PET film as the dielectric layer.

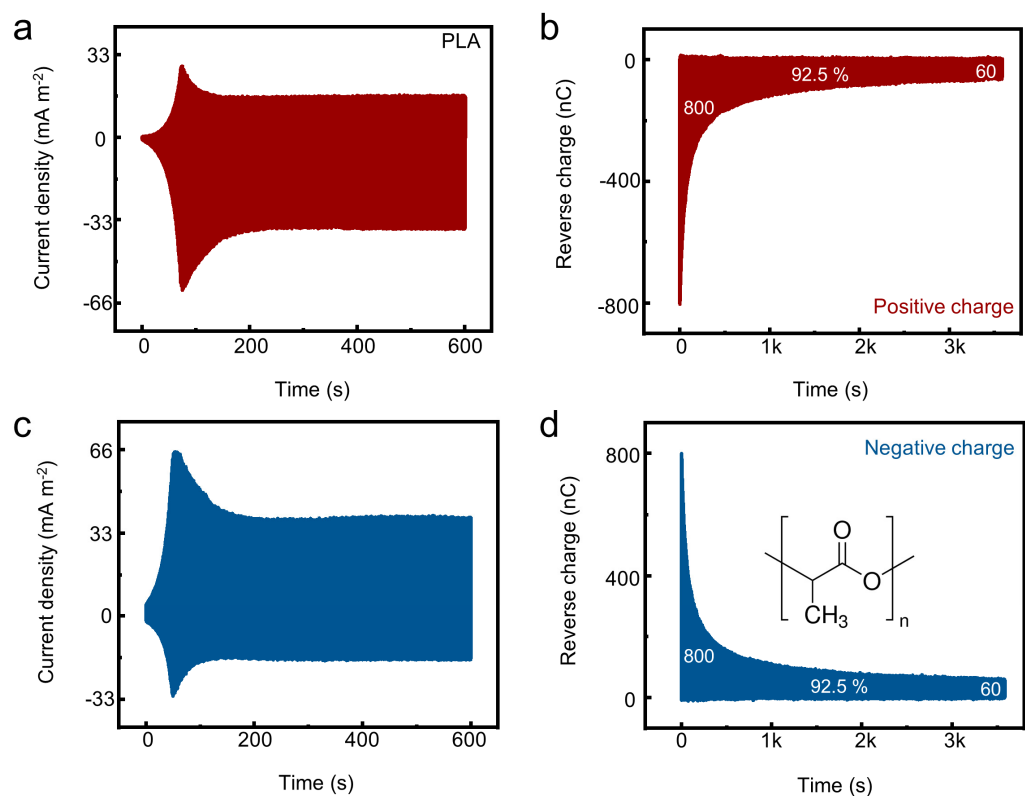

**Fig. S28:** The output characteristics of UH-CSI-TENG with PLA as triboelectric material. a) Dynamic current density output with positive charge injection, b) Charge dissipation of the injected positive charge, c) Dynamic current density output with negative charge injection, and d) Charge dissipation of the injected negative charge, using PLA film as the dielectric layer.

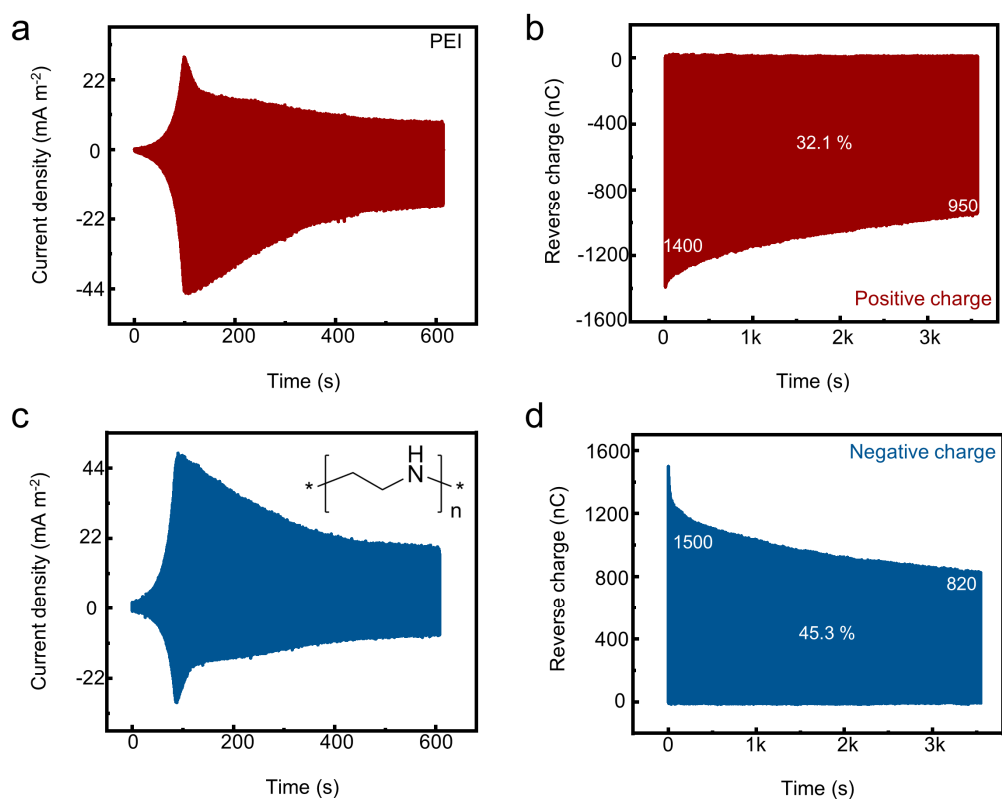

**Fig. S29:** The output characteristics of UH-CSI-TENG with PEI as triboelectric material. a) Dynamic current density output with positive charge injection, b) Charge dissipation of the injected positive charge, c) Dynamic current density output with negative charge injection, and d) Charge dissipation of the injected negative charge, using PEI film as the dielectric layer.

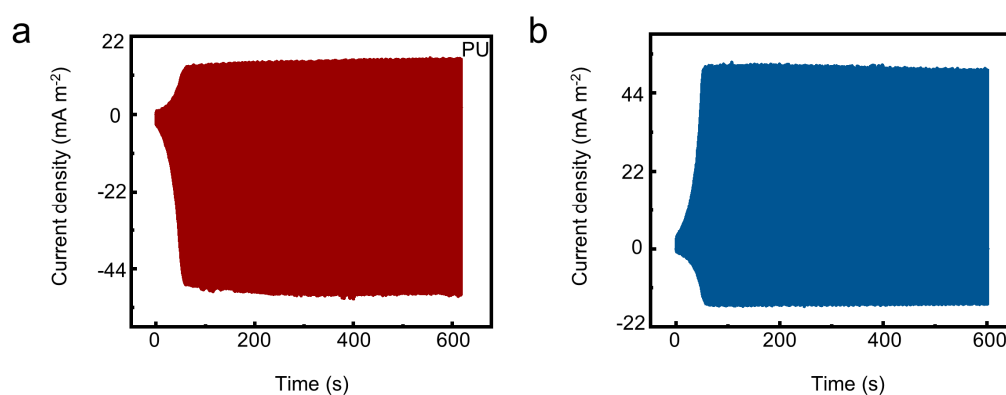

**Fig. S30:** The output characteristics of UH-CSI-TENG with PU as triboelectric material. a) Dynamic current density output with positive charge injection, and b) Dynamic current density output with negative charge injection, using PU film as the dielectric layer.

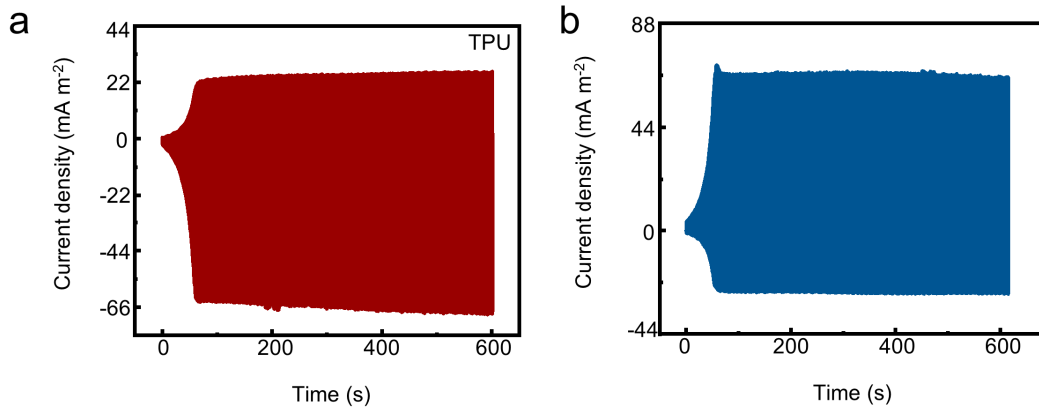

**Fig. S31:** The output characteristics of UH-CSI-TENG with TPU as triboelectric material. a) Dynamic current density output with positive charge injection, and b) Dynamic current density output with negative charge injection, using TPU film as the dielectric layer.

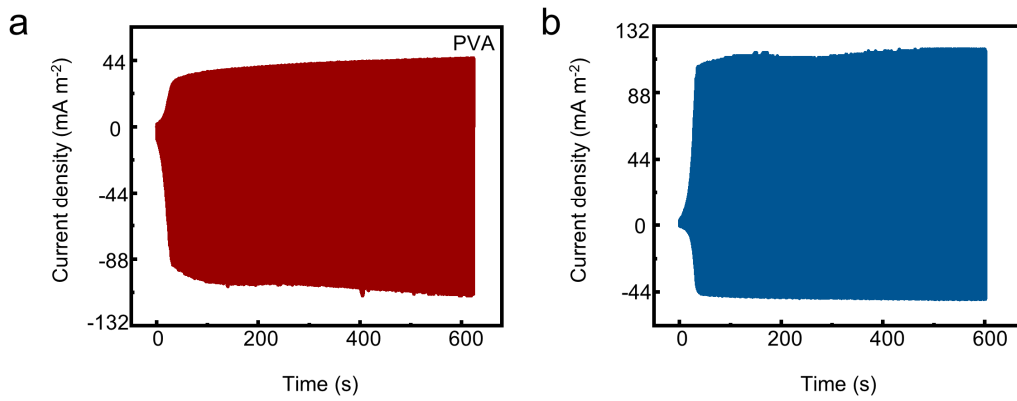

**Fig. S32:** The output characteristics of UH-CSI-TENG with PVA as triboelectric material. a) Dynamic current density output with positive charge injection, and b) Dynamic current density output with negative charge injection, using PVA film as the dielectric layer.

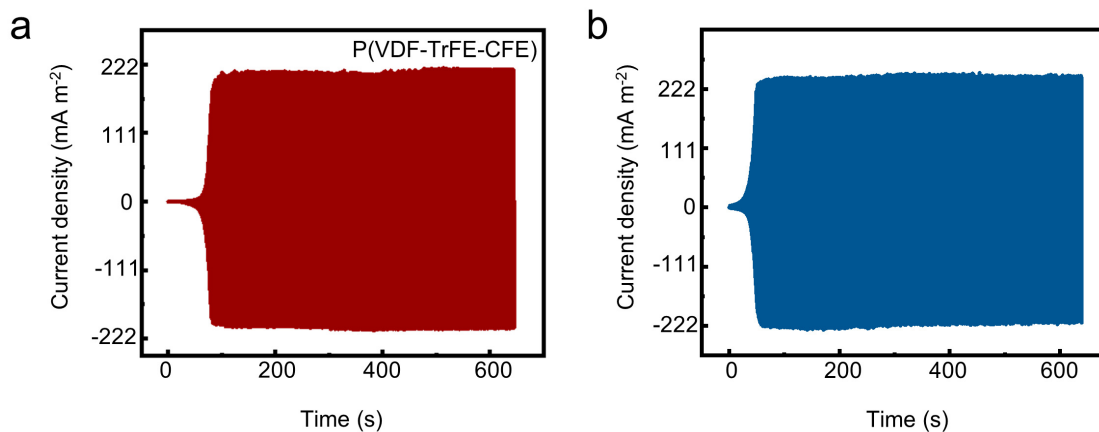

**Fig. S33:** The output characteristics of UH-CSI-TENG with P(VDF-TrFE-CFE) as triboelectric material. a) Dynamic current density output with positive charge injection, and b) Dynamic

current density output with negative charge injection, using P(VDF-TrFE-CFE) film as the dielectric layer.

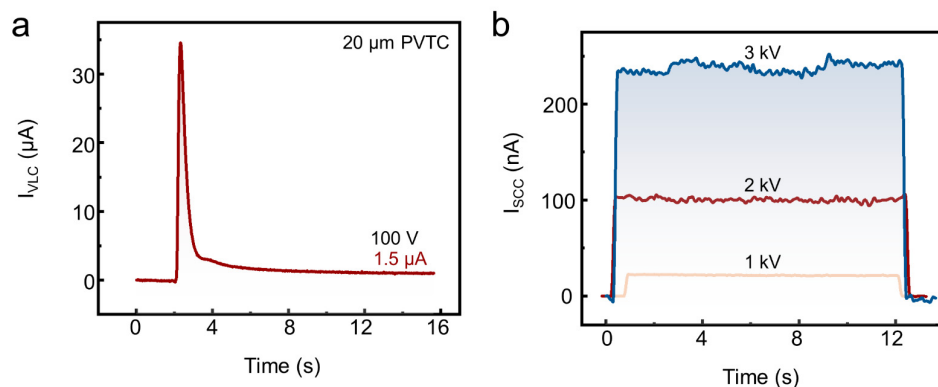

**Fig. S34:** Charge leakage current and surface conduction current of PVTC. a) Charge leakage current at a voltage of 100V. b) Surface conduction current at different voltages.

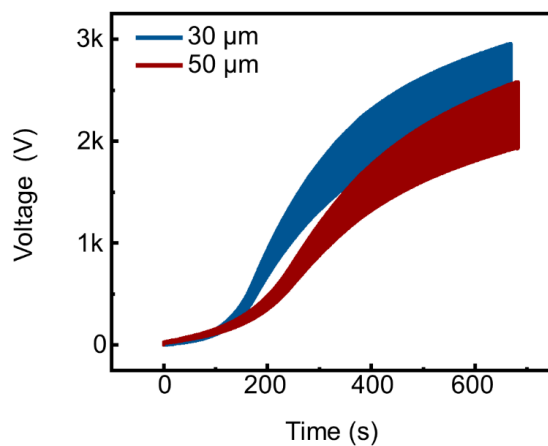

**Fig. S35:** Dynamic excitation voltage of PI with different thickness.

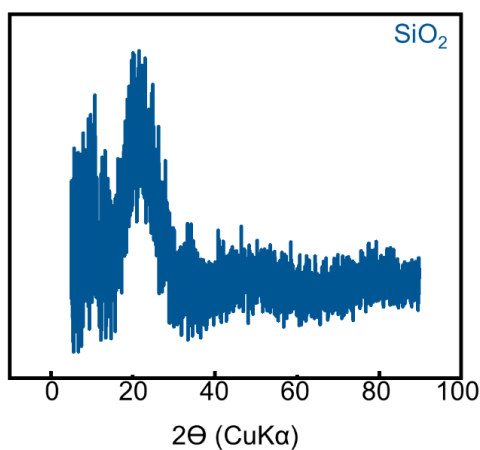

**Fig. S36:** Crystalline phase of silica.

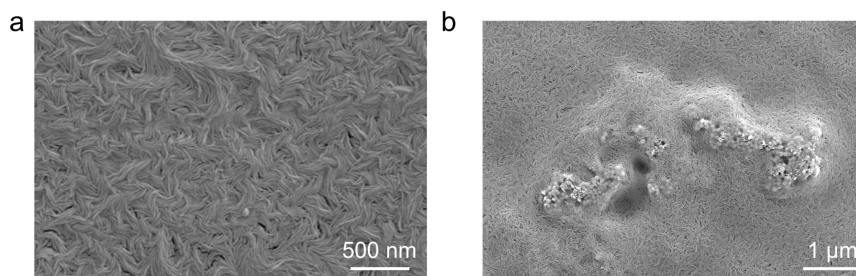

**Fig. S37:** SEM image of charge transport layer. a) Normal doping. b) Excessive doping.

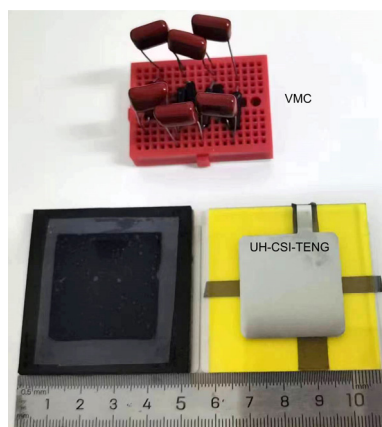

**Fig. S38:** Structure configuration of UH-COI-TENG.



**Table S1. Output charge density and charge dissipation rate comparison in the developmental stage of TENG**

| <b>Materials</b>       | <b>Charge density<br/>(<math>\mu\text{C m}^{-2}</math>)</b> | <b>Charge<br/>dissipatio<br/>n rate</b> | <b>Modification<br/>method</b>         | <b>Years</b> | <b>Literature</b>                                   |
|------------------------|-------------------------------------------------------------|-----------------------------------------|----------------------------------------|--------------|-----------------------------------------------------|
| PET&KH5<br>56          | 77.6                                                        | 86%                                     | Deep Trap<br>Construction              | 2024         | Adv. Mater.<br>2024, 2303389                        |
| Mxene/TiO <sub>2</sub> | 128                                                         | 58.3%                                   | Electron trapping<br>& blocking effect | 2022         | Nano Energy<br>98 (2022)<br>107236                  |
| PTFE                   | 190                                                         | 10%                                     | Surface-charge<br>engineering          | 2021         | J. Mater.<br>Chem. A,<br>2021, 9,<br>21357–21365    |
| ECTFE                  | 391                                                         | 48%                                     | Quenching<br>polarization              | 2023         | Adv. Funct.<br>Mater. 2023,<br>33, 2302164          |
| FEP                    | 510                                                         | -                                       | Repeated<br>rheological<br>forging     | 2022         | NATURE<br>COMMUNIC<br>ATIONS  <br>(2022)<br>13:4083 |
| Ionized-<br>PTFE       | 525                                                         | -                                       | Radical anion<br>transfer              | 2023         | Matter 6,<br>1295–1311                              |
| PI                     | 880                                                         | 45%                                     | External charge<br>excitation          | 2022         | Adv. Funct.<br>Mater. 2022,<br>32, 2203884          |

|                                    |      |       |                                                                         |      |                                         |
|------------------------------------|------|-------|-------------------------------------------------------------------------|------|-----------------------------------------|
| MoS <sub>2</sub> /SiO <sub>2</sub> | 1072 | 25%   | Electric-field-driven interfacial trapping of drifting                  | 2023 | Energy Environ. Sci., 2023, 16, 598–609 |
| PI                                 | 1480 | 64.4% | Discharge Mitigation Strategy                                           | 2023 | Adv. Energy Mater. 2023, 13, 2302099    |
| P(VDF-TrFE)                        | 2670 | 92%   | Ultra-Fast Charge Self-Injection Technique                              | 2024 | Adv. Mater. 2024, 2312148               |
| This work                          | 3880 | 40%   | Optimize trap distribution and construct charge transfer/blocking layer | 2024 |                                         |

**Table S2. Quantify the charge (positive/negative) trapping and de-trapping ability of traditional triboelectric materials**

| <b>Materials</b>   | <b>Full name</b>                                 | <b>Positive charge (nC)</b> | <b>Positive charge dissipation rate</b> | <b>Negative charge (nC)</b> | <b>Positive charge dissipation rate</b> |
|--------------------|--------------------------------------------------|-----------------------------|-----------------------------------------|-----------------------------|-----------------------------------------|
| <b>ETFE</b>        | Ethylene-terafluoroethylene                      | 240                         | 41.6%                                   | 280                         | 42.8%                                   |
| <b>PCTFE</b>       | Polychlorotrifluoroethylene                      | 265                         | 16.9%                                   | 300                         | 0.07%                                   |
| <b>FEP</b>         | Fluorinated ethylene propylene                   | 270                         | 11.1%                                   | 300                         | 0.01%                                   |
| <b>BOPP</b>        | Biaxially oriented polypropylene                 | 260                         | 0.01%                                   | 310                         | 0.01%                                   |
| <b>PTFE</b>        | Polytetrafluoroethylene                          | 290                         | 0.03%                                   | 310                         | 0.01%                                   |
| <b>POF</b>         | Polyolefin                                       | 400                         | 31.2%                                   | 385                         | 23.3%                                   |
| <b>PP</b>          | Polypropylene                                    | 450                         | 22.2%                                   | 490                         | 15.3%                                   |
| <b>PFA</b>         | Perfluoroalkoxy                                  | 410                         | 24.3%                                   | 500                         | 14%                                     |
| <b>PVC</b>         | Polyvinyl chloride                               | 700                         | 34.3%                                   | 670                         | 0.08%                                   |
| <b>PI</b>          | Polyimide                                        | 690                         | 10.1%                                   | 830                         | 9.63%                                   |
| <b>PVDC</b>        | Polyvinylidene chloride                          | 1150                        | 89.5%                                   | 1150                        | 86.1%                                   |
| <b>P(VDF-HFP)</b>  | Poly(vinylidene fluoride-co-hexafluoropropylene) | 1200                        | 96.7%                                   | 1300                        | 95.3%                                   |
| <b>PVDF</b>        | Polyvinylidene fluoride                          | 1200                        | 88.3%                                   | 1320                        | 65.2%                                   |
| <b>P(VDF-TrFE)</b> | Poly (vinylidene fluoride-trifluoroethylene)     | 1700                        | 90.1%                                   | 1800                        | 84.4%                                   |
| <b>PPS</b>         | Polyphenylene sulfide                            | 235                         | 0.06%                                   | 240                         | 16.7%                                   |
| <b>PS</b>          | Polystyrene                                      | 265                         | 50.9%                                   | 240                         | 62.5%                                   |
| <b>PE</b>          | Polyethylene                                     | 345                         | 63.7%                                   | 320                         | 81.2%                                   |

|             |                               |      |       |      |       |
|-------------|-------------------------------|------|-------|------|-------|
| <b>PDMS</b> | Polydimethylsiloxane          | 350  | 8.5%  | 350  | 11.4% |
| <b>PMMA</b> | Polymethyl<br>Methacrylate    | 390  | 48.7% | 355  | 69.1% |
| <b>PEEK</b> | Poly(ether-ether-<br>ketone)  | 420  | 0.1%  | 400  | 12.5% |
| <b>PC</b>   | Polycarbonate                 | 550  | 0.03% | 510  | 15.7% |
| <b>PAN</b>  | Polyacrylonitrile             | 670  | 67.1% | 700  | 74.3% |
| <b>PA</b>   | Polyamide                     | 700  | 25.7% | 700  | 40%   |
| <b>PET</b>  | Polyethylene<br>terephthalate | 760  | 0.05% | 720  | 11.1% |
| <b>PLA</b>  | Poly(lactic acid)             | 800  | 92.5% | 800  | 92.5% |
| <b>PEI</b>  | Polyetherimide                | 1400 | 32.1% | 1500 | 45.3% |

**Note S1: Calculate the trap state distribution of dielectric polymer**

The details of calculation are based on the theory proposed by Simmons and Tam, it is assumed that the trapping process does not occur after the charge is trapped during the surface potential decay process, and the composite behavior of holes and electrons is ignored. The current density  $J$  formed by the holes excited to the valence band can be expressed as:

$$J = \frac{qL}{2} \int_{E_V}^{E_F} (1 - f_0(E)) N_t(E) e_n(E) e^{-e_n t} dE \quad (1)$$

where  $q$  is the hole charge amount;  $L$  is the thickness of the sample;  $E$  is the energy level;  $E_F$  is the Fermi level;  $E_V$  is the highest energy level in the valence band;  $f_0(E)$  is the initial electron occupancy of the trap;  $N_t(E)$  is the continuous distribution function of traps; define a local state hole trap in the forbidden band as  $E_m$ , then the probability  $e_n(E)$  of the hole trap excited by  $E = E_m - E_V$  on the valence band is

$$e_n(E) = \nu e^{-\frac{E}{k_B T}} = \nu e^{-\frac{E_m - E_V}{k_B T}} \quad (2)$$

where  $\nu$  is the escape frequency factor of the trap charge;  $k_B$  is the Boltzmann constant;  $T$  is the absolute temperature. The function  $G(E, t)$  is introduced as

$$G(E, t) = e_n e^{-e_n t} = B \delta(E - E_m) \quad (3)$$

where  $G(E, t)$  represents the weight of the trap electron with energy level  $E$  at the time  $t$  to the discharge current;  $\delta(E - E_m)$  is the impulse function. Integrate both sides of eq 3,  $B$  is given by

$$B = \int_{E_V}^{E_F} e_n(E) e^{-e_n(E)t} dE = \frac{k_B}{t} (1 - e^{-\nu t}) \approx \frac{k_B}{t} \quad (4)$$

Substituting eq 4 into eq 1, and setting  $f_0(E) = 0.5$ ,  $J$  is given by

$$J = \frac{qLk_B T}{4t} N_t(E) \quad (5)$$

Meanwhile, the current density  $J$  can be expressed as the surface potential decay process as

$$J = \frac{\varepsilon_0 \varepsilon_r}{L} \left| \frac{dV_s(t)}{dt} \right| \quad (6)$$

where  $\varepsilon_0$  is the dielectric constant of the vacuum;  $\varepsilon_r$  is the relative dielectric constant of the sample;  $V_s(t)$  is the surface potential value of the sample at time  $t$ . Simultaneously eqs 5 and 6,  $N_t(E)$  is given by

$$N_t(E) = \frac{4\varepsilon_0 \varepsilon_r}{qL^2 T k_B} \left| t \frac{dV_s(t)}{dt} \right| \quad (7)$$

Trap energy  $E$  can be expressed as

$$E = E_m - E_V = k_B T \ln(\nu t) \quad (8)$$

and the surface potential decay curve is fitted to obtain the  $V_s(t)$  function expression. Using the eqs 7 and 8, the trap energy of the sample can be obtained distribution characteristics. Experiments show that the ISPD curve of dielectric layers can be well fitted by using the double exponential function. The expression of the double exponential function is

$$V_S(t) = A_1 e^{-t/\tau_1} + A_2 e^{-t/\tau_2} \quad (9)$$

where  $A_1$ ,  $A_2$  and  $\tau_1$ ,  $\tau_2$  are fitting parameters. Use eqs 7 and 8 to calculate the trap level distributions corresponding to the two parts  $A_1 e^{-t/\tau_1}$  and  $A_2 e^{-t/\tau_2}$ , and obtain the energy level distribution characteristics corresponding to the two trap centers.

\* $k_B=1.38 \times 10^{-23} \text{ m}^2 \text{ kg s}^{-2} \text{ K}^{-1}$ ;  $\nu=4.1 \times 10^{13} \text{ s}^{-1}$ ;  $\epsilon_0=8.85 \times 10^{-12} \text{ F/m}$ ;  $T=298.15 \text{ K}$ ;  $q=1.602 \times 10^{-19} \text{ C}$ .

**Note S2: Measure charge leakage current and surface conduction current**

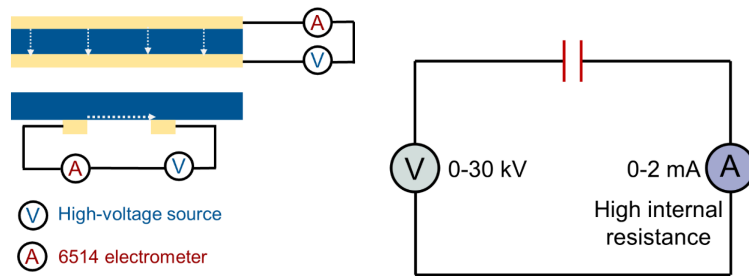

1) A copper metal layer of about  $1\mu\text{m}$  is hot evaporated onto the sample's surface to assemble a capacitor. The current passing through the capacitor is recorded using an electrometer.

2) It is worth noting that the leakage current ( $I_{VLC}$ ) of the polymer consists of the conductive leakage current ( $I_L$ ), capacitive charge leakage current ( $I_C$ ), and polarization absorption leakage current ( $I_A$ ). Here,  $I_L$  characterizes the insulation ability of the polymer and needs to be read after the current maintains stability.

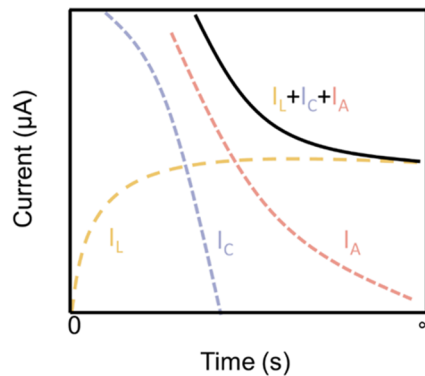

Conductive leakage current ( $I_L$ ) is a small amount of current (usually measured in microamperes) that flows through insulation, between conductors, or from conductors to the ground. Since it is relatively stable and time-independent, this is the most crucial current to measure insulation resistance. Capacitive charge leakage current ( $I_C$ ) is caused by the capacitance effect, when a DC voltage is applied, this current lasts only a few seconds and gradually decreases until the capacitor is fully charged. Polarization absorption leakage current ( $I_A$ ) is caused by molecular polarization within dielectric materials. In low-capacitance devices, the current is high for the first few seconds and slowly decreases to almost zero.

3)  $I_{SC}$  is determined only by the surface conductance of the dielectric polymer, independent of polarization absorption leakage current and capacitive charge leakage current.

### **Note S3: Surface potential measurement by KPFM**

Tips of KPFM measurements (Dimension icon, Bruker) coated Pt/Ir layer with a typical tip radius of  $\sim 20$  nm, resonant frequency of  $\sim 75$  kHz and force constant  $k$  of  $\sim 2.8$  N/M. The lift height of tip is set to 50 nm and employing the tapping mode is used. The spatial resolution of KPFM is about in the order of several tens of nanometers.

The experiment begins in contact mode with an applied voltage of 2V. The scanning area of the polymer is  $2 \times 2 \mu\text{m}$ , and the scanning frequency is 0.1 Hz. After that, it switches to non-contact mode with a fixed needle tip 50 nm away from the polymer. The surface potential of the polymer is scanned in real time, and then the potential is scanned again one hour later.

There are many influence factors that could influence our KPFM tests such as probe tip condition, surface adsorption or doping, probe lift height, probe biased voltage, surrounding environment, etc. To make sure the accuracy of KPFM, all the tests are on the same tip for a specific sample to minimize the tip effect.
